# Supplementary material
Source: publisher figshare collection journal article supplement (https://acs.figshare.com/ndownloader/files/21018396)
Supplement: Supplementary file 1 [file 21018396]

## Supporting information

# Endosomolytic and Tumor-Penetrating Mesoporous Silica Nanoparticles for siRNA/miRNA Combination Cancer Therapy

*Yazhe Wang,<sup>1, †, §</sup> Ying Xie,<sup>1, †, §</sup> Kameron V. Kilchrist,<sup>‡</sup> Jing Li,<sup>†</sup> Craig L. Duvall,<sup>‡</sup> David  
Oupicky<sup>†\*</sup>*

<sup>†</sup> Center for Drug Delivery and Nanomedicine, Department of Pharmaceutical Sciences,  
University of Nebraska Medical Center, Omaha, Nebraska, United States

<sup>‡</sup> Department of Biomedical Engineering, Vanderbilt University, Nashville, Tennessee, United  
States

<sup>§</sup> Present address: Department of Biomedical Engineering, Yale University, New Haven,  
Connecticut, United States

<sup>1</sup> These authors contributed equally

\*Corresponding author: [david.oupicky@unmc.edu](mailto:david.oupicky@unmc.edu)

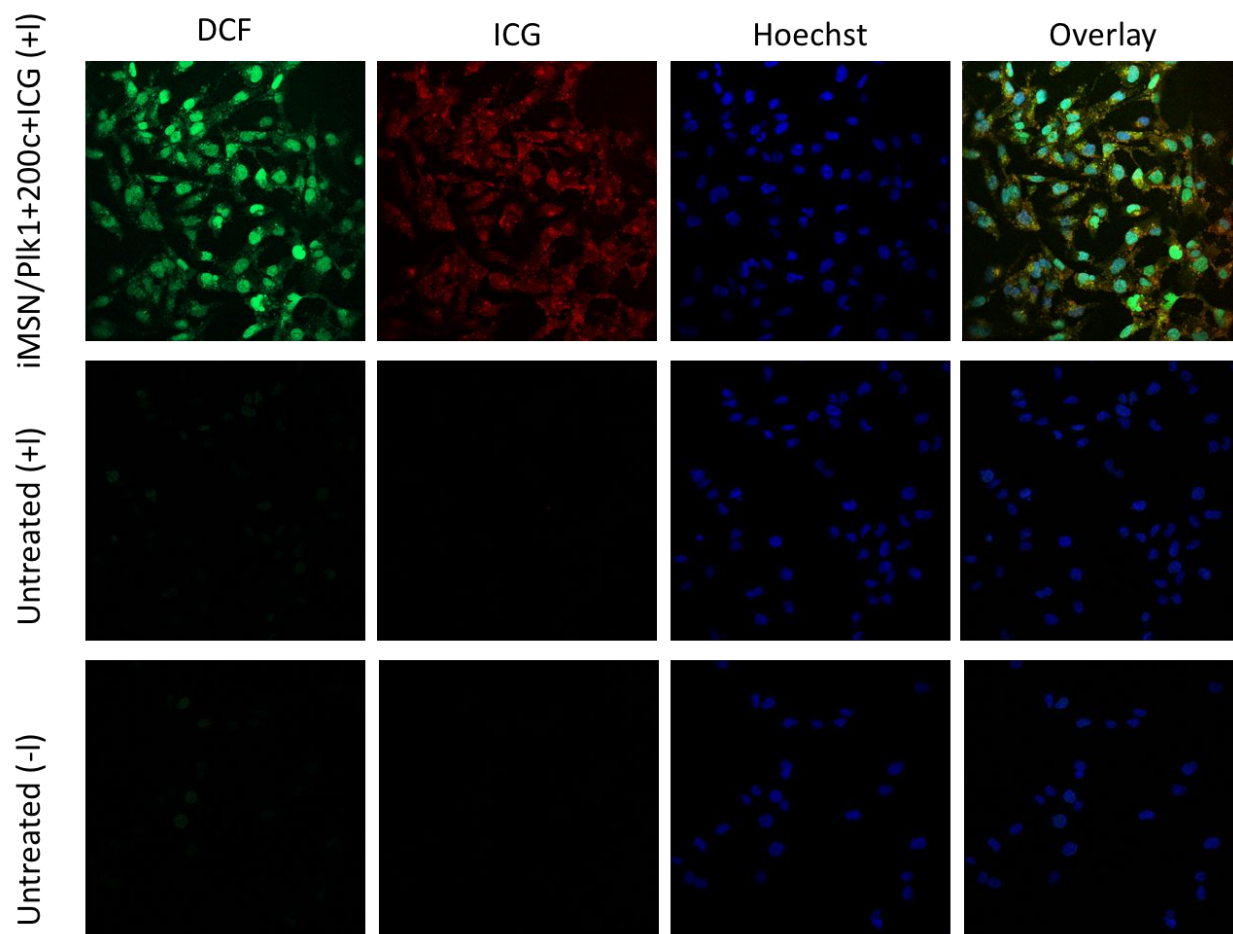

**Figure S1.** ROS generation following 4 h incubation of tumor cells with nanoparticle and laser irradiation. Confocal images of MDA-MB-231 cells stained by ROS detecting probe DCF (green). Cell nuclei were stained by Hoechst 33258.

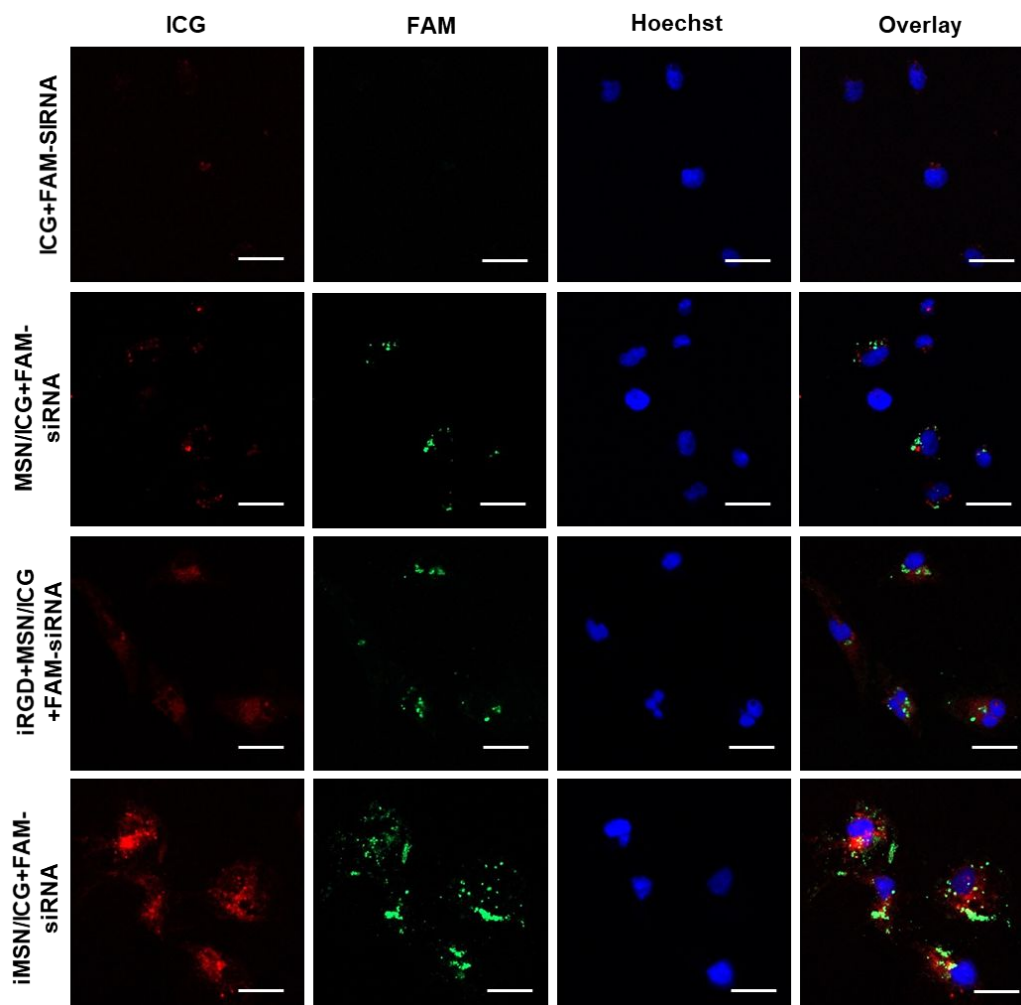

**Figure S2.** Cellular uptake in MDA-MB-231 cells by confocal microscopy. The cells were incubated with the nanoparticles or free ICG+FAM-siRNA for 4 h. Nuclei were stained with Hoechst dye. Red fluorescence of ICG, green fluorescence of FAM-siRNA. Scale bar, 20  $\mu$ m.

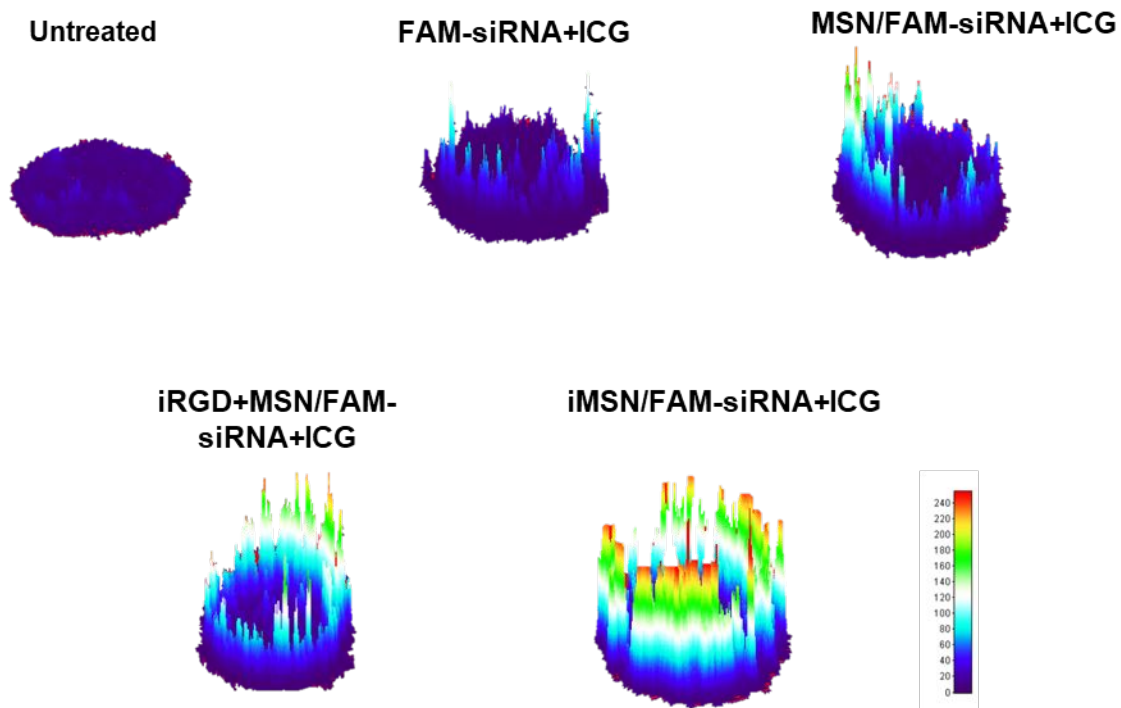

**Figure S3.** Surface plot images of MDA-MB-231 tumor spheroids treated with free FAM-siRNA+ICG, MSN/FAM-siRNA+ICG, iRGD+MSN/FAM-siRNA+ICG, iMSN/FAM-siRNA+ICG and negative control. Fluorescence signal was from FAM-siRNA channel.

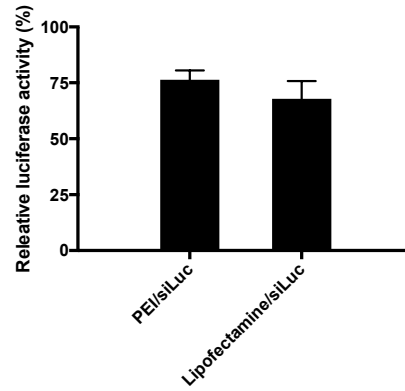

**Figure S4.** Luc silencing efficacy of siLuc loaded with PEI and Lipofectamine 3000 in MDA-MB-231.Luc cells. Data are shown as mean  $\pm$  SD (n = 3).

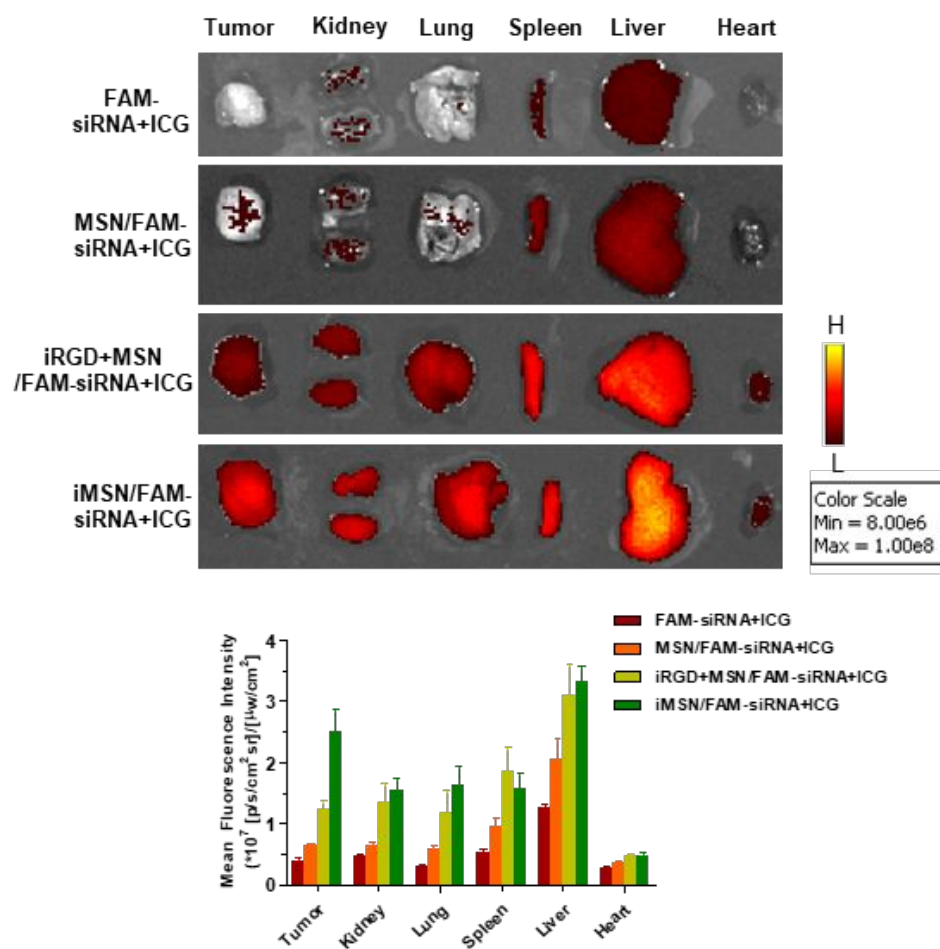

**Figure S5.** *Ex vivo* images of tumors and other tissues at 48 h after injection and semiquantification of nanoparticle biodistribution in mice tissues. Results are expressed as mean fluorescence intensity  $\pm$  SD (n = 3).

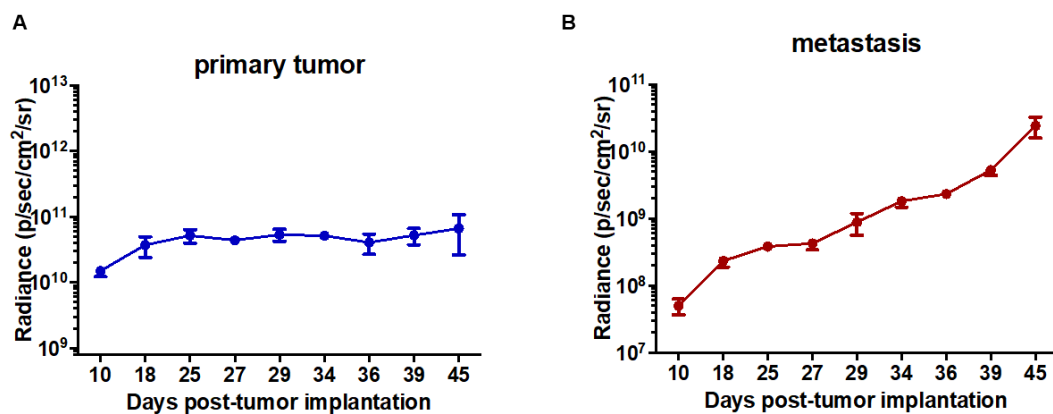

**Figure S6.** Quantitative analysis of bioluminescence signal from primary tumor (A) and metastasis (B) in untreated tumor-bearing mice post-tumor implantation. Results are expressed as mean fluorescence intensity  $\pm$  SD (n = 5).

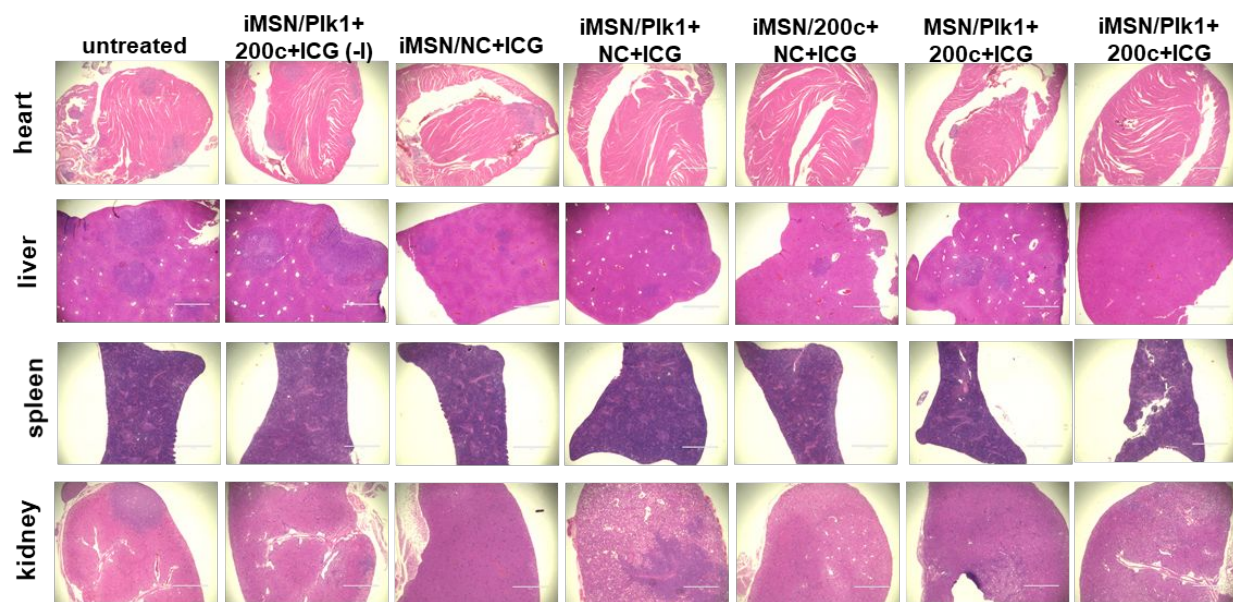

**Figure S7.** Histological observation of tissue sections from major organs of mice was performed after the treatment. The organ sections were stained with hematoxylin and eosin (H&E). Scale bar, 1000  $\mu\text{m}$  (4x), 100  $\mu\text{m}$  (40x).



Table S1. Blood biochemistry of tumor-bearing mice treated with iMSN/NC+ICG, iMSN/Plk1+200c+ICG (+/-light) or saline from the efficacy experiment.

|                           | Saline   | NC+ICG   | Plk1+200c+ICG (-l) | Plk1+200c+ICG (+l) |
|---------------------------|----------|----------|--------------------|--------------------|
| WBC (10 <sup>9</sup> /L)  | 6.2±3.9  | 4.6±1.4  | 5.2±0.8            | 3.1±0.5            |
| LYM (10 <sup>9</sup> /L)  | 0.7±0.6  | 0.6±0.3  | 0.5±0.2            | 0.9±0.6            |
| MON (10 <sup>9</sup> /L)  | 0.4±0.2  | 0.4±0.1  | 0.4±0.1            | 0.2±0.2            |
| NEU (10 <sup>9</sup> /L)  | 5.2±3.1  | 3.5±1.6  | 4.3±0.6            | 2.0±0.6            |
| RBC (10 <sup>12</sup> /L) | 8.9±0.5  | 8.9±0.3  | 9.2±0.7            | 8.1±0.3            |
| HGB (g/dL)                | 15.2±0.6 | 15.0±0.7 | 15.3±1.1           | 14.0±0.8           |
| HCT (%)                   | 42.1±3.7 | 40.7±1.5 | 41.7±2.9           | 35.9±1.5           |
| MCV (fl)                  | 46.0±0.0 | 46.0±0.0 | 46.0±1.0           | 45.0±0.0           |
| MCH (pg)                  | 16.7±1.0 | 16.8±0.3 | 16.7±0.1           | 17.6±0.5           |
| MCHC (g/dL)               | 37.3±1.0 | 36.8±0.5 | 36.8±0.7           | 39.1±0.9           |
| RDWc (%)                  | 18.6±0.2 | 18.5±0.5 | 18.1±0.3           | 19.1±0.6           |
| RDWs (fl)                 | 34.1±0.5 | 34.1±0.9 | 32.8±0.8           | 34.4±0.8           |
| PLT (10 <sup>9</sup> /L)  | 656±77   | 594±52   | 614±78             | 705±172            |
| MPV (fl)                  | 6.0±0.3  | 6.2±0.2  | 6.2±0.1            | 6.0±0.1            |
| PCT (%)                   | 0.4±0.1  | 0.4±0.0  | 0.4±0.1            | 0.4±0.1            |
| PDWc (%)                  | 29.3±0.6 | 29.3±0.6 | 30.5±1.0           | 29.1±1.2           |
| PDWs (fl)                 | 6.1±0.3  | 6.1±0.3  | 6.6±0.5            | 6.0±0.5            |
| BUN (mg/dL)               | 26.2±2.5 | 24.2±4.5 | 28.0±7.3           | 20.7±7.1           |
| CRE (mg/dL)               | 2.2±0.2  | 2.2±0.6  | 1.9±0.1            | 1.7±0.3            |
| AST (U/L)                 | 29.0±1.2 | 27.5±6.6 | 26.3±4.7           | 26.1±2.5           |
| ALT (U/L)                 | 4.5±0.9  | 5.1±1.5  | 5.3±1.0            | 5.3±0.6            |
